# Supplementary material for: Degradation of antibiotic fosfomycin by peroxymonosulfate/ferrate and simultaneous phosphate removal with in situ formed ferric nanoparticles
Source: Royal Society of Chemistry journal article supplement (doi:10.1039/d5en00701a), 2025-11-20
Supplement: d5en00701a1.pdf [file d5en00701a1.pdf]

## Supplementary Material

### **Degradation of antibiotic fosfomycin by peroxymonosulfate/ferrate and simultaneous phosphate removal with in situ formed ferric nanoparticles**

Wen Jiang,<sup>1</sup> Wenhao Lao,<sup>1</sup> Zhe Xu,<sup>1</sup> Yiping Feng,<sup>1\*</sup> Jiuli Ruan,<sup>2\*</sup>

*<sup>1</sup>Guangdong Key Laboratory of Environmental Catalysis and Health Risk Control, School of Environmental Science and Engineering, Institute of Environmental Health and Pollution Control, Guangdong University of Technology, Guangzhou 510006, China*

*<sup>2</sup>State key Laboratory of Environment Criteria and Risk Assessment, Chinese Research Academy of Environmental Sciences, Beijing 100012, China*

\*Corresponding author: Yiping Feng, E-mail: ypfeng@gdut.edu.cn; Jiuli Ruan, E-mail: ruanjiuli1987@163.com

## Experimental Procedures

### **Text S1. Quantification of FOS via Liquid Chromatography-Triple Quadrupole Mass Spectrometry.**

Fosfomycin (FOS) was quantified using a liquid chromatography-triple quadrupole mass spectrometer (LC-MS/MS; TSQ Quantiva, Thermo Scientific) fitted with a heated electrospray ionization (H-ESI) source. Data collection and analysis were conducted using Thermo Scientific Xcalibur software (version 4.1). Chromatographic separation was achieved on a Thermo Hypersil GOLD C18 column (10 × 2.1 mm, 1.9 μm). The mobile phase consisted of two components: deionized (DI) water containing 0.1% formic acid and methanol. A gradient elution program (detailed in **Table S2**) was employed, with a constant flow rate of 0.2 mL min<sup>-1</sup>. The injection volume of each sample was 2 μL, and the column temperature was kept constant at 35 °C. For mass spectrometric detection, the instrument was operated in negative ionization mode. The target ion for FOS was monitored at a mass-to-charge ratio (m/z) of 137. Instrument parameters were set as follows: spray voltage = 2.5 kV; capillary temperature = 320 °C; and vaporizer temperature = 350 °C.

## **Text S2. Identification of degradation products of FOS.**

Following 20 minutes of Fe(VI)/PMS treatment, reaction solutions were collected to maximize the variety of transformation products for identifying FOS degradation products. These products were analyzed using ultra-high-performance liquid chromatography coupled with hybrid quadrupole-orbitrap mass spectrometry (UPLC-Q-Exactive Orbitrap-MS, Thermo, Bremen, Germany). The mass spectrometer, equipped with an electrospray ionization (ESI) source, was operated in both positive and negative ionization modes across a mass-to-charge ( $m/z$ ) range of 70–1000. Instrument parameters were set as follows: capillary temperature = 320 °C; auxiliary gas heater temperature = 350 °C; spray voltage = 4.0 kV (positive mode) and 3.0 kV (negative mode). Nitrogen gas (99.999% purity) was used as the collision and dissociation gas at a flow rate of 10 L min<sup>-1</sup>. Chromatographic separation was achieved on a Hypersil GOLD C18 column (100 × 2.1 mm, 1.9 μm). The mobile phase comprised deionized (DI) water with 0.1% formic acid and methanol, delivered at a flow rate of 0.25 mL min<sup>-1</sup>. Samples were injected with a volume of 10 μL, and the column temperature was maintained at 35 °C.

### **Text S3. Toxicity assessment of FOS and its degradation products.**

The toxicity of FOS and its degradation products was evaluated by using *Escherichia coli* (*E. coli*) ATCC25922, a representative Gram-negative bacterium, obtained from the Beijing Microbiological Culture Collection Center (Beijing, China). Prior to the toxicity test, *E. coli* was cultured in a 200 mL conical flask containing 100 mL of Luria-Bertani (LB) medium. The flask was incubated in a thermostatic water bath shaker (SHA-B, Bo Yuan Instrument Manufacture, China) at 37 °C for 18–20 hours. Following incubation, the bacterial cells were harvested by centrifugation at 8,000 rpm for 10 minutes, washed twice with fresh LB medium, and resuspended in the same medium to prepare a uniform bacterial suspension for subsequent experiments.

For assessing FOS and its degradation products' toxicity, *E. coli* cells were exposed to varying concentrations of FOS over an 8-hour period. At regular intervals, samples were collected, and the absorbance of the bacterial suspension was measured at 600 nm to monitor cell growth, thereby evaluating the toxic effects of FOS on *E. coli*.<sup>1</sup> Additionally, the toxicity of transformation products generated during the degradation process was investigated using the same bacterial strain. The survival rate of *E. coli* was calculated using Equation S1,

$$\text{Survival (\%)} = \frac{\text{OD}_{600,t}}{\text{OD}_{600,0}} \times 100\% \quad (\text{S1})$$

**Scheme S1. Radical interconversion reactions.<sup>2-5</sup>**

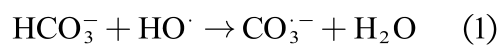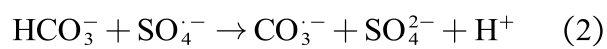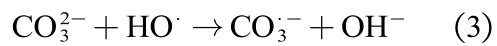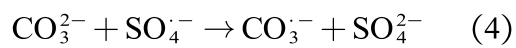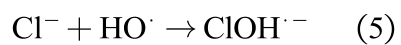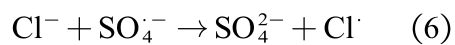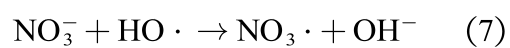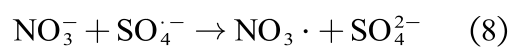

## Supplementary Figures

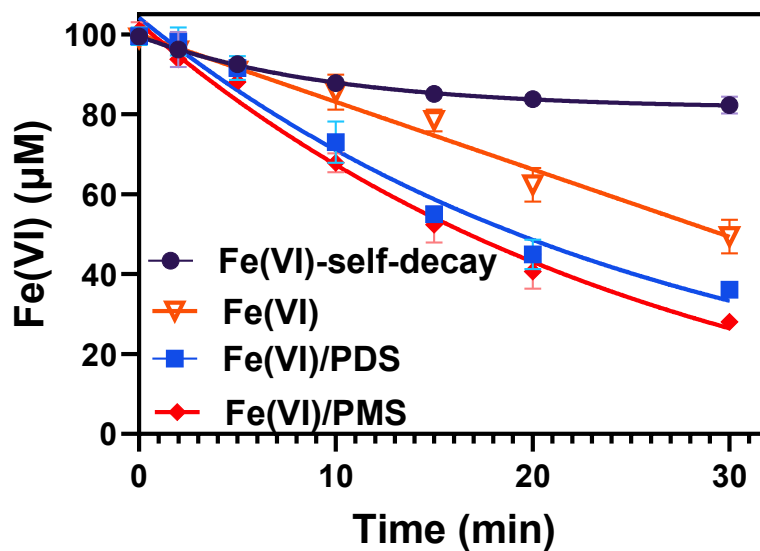

**Figure S1.** Fe(VI) concentration change during FOS degradation in Fe(VI), Fe(VI)/PDS, and Fe(VI)/PMS systems. Experimental conditions:  $[\text{FOS}]_0 = 10 \mu\text{M}$ ,  $\text{Fe(VI)} = 200 \mu\text{M}$ ,  $[\text{PDS}]_0 = [\text{PMS}]_0 = 100 \mu\text{M}$ , initial pH = 7.0, and temperature = 25 °C.

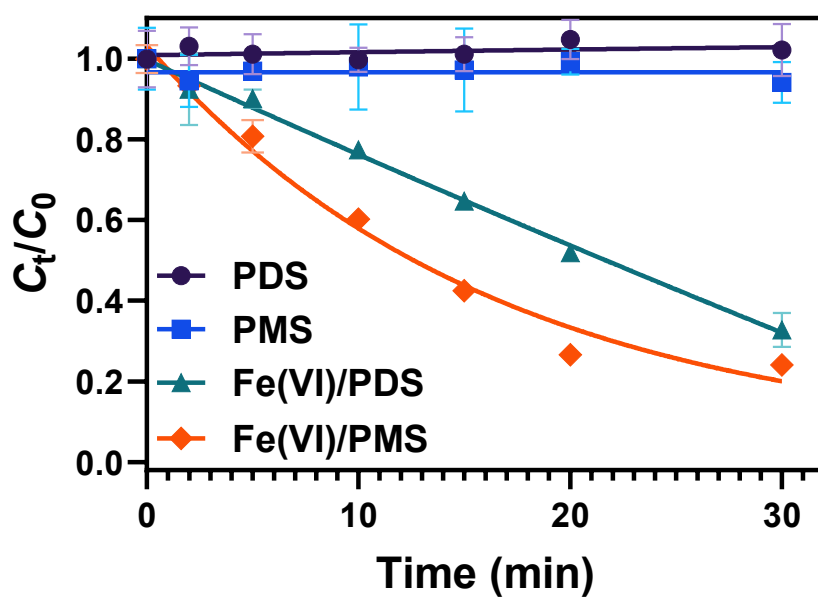

**Figure S2.** Residual persulfate concentration during FOS degradation in PDS, PMS, Fe(VI)/PDS, and Fe(VI)/PMS systems. Experimental conditions:  $[\text{FOS}]_0 = 10 \mu\text{M}$ ,  $\text{Fe(VI)} = 200 \mu\text{M}$ ,  $[\text{PDS}]_0 = [\text{PMS}]_0 = 100 \mu\text{M}$ , initial pH = 7.0, and temperature = 25 °C.

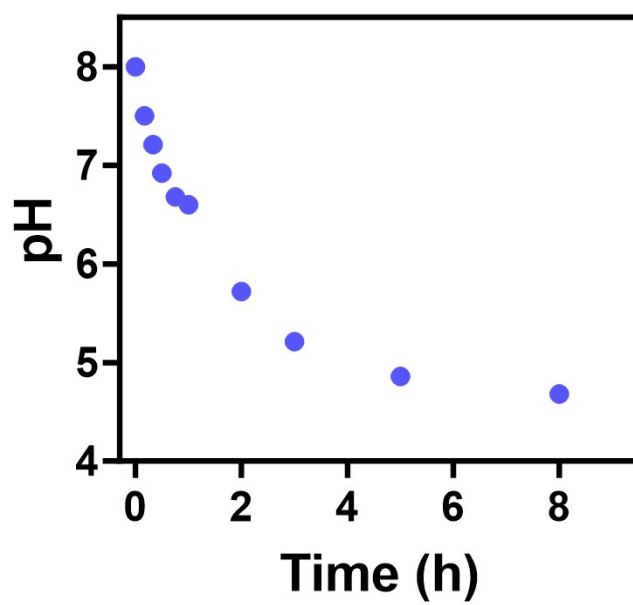

**Figure S3.** Changes in the pH of the reaction system during the reaction process.



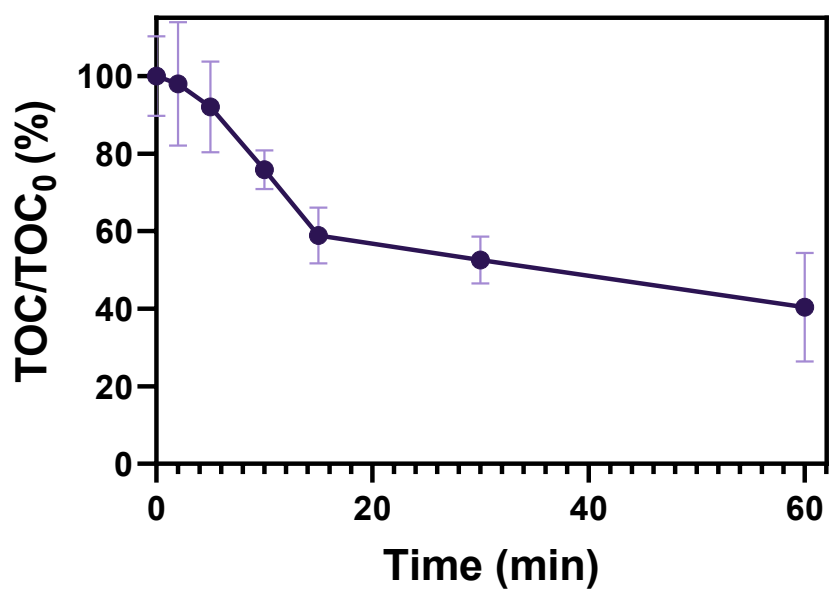

**Figure S4.** Changes of total organic carbon (TOC) content during FOS degradation. Experimental conditions:  $[\text{FOS}]_0 = 10 \mu\text{M}$ ,  $\text{Fe(VI)} = 200 \mu\text{M}$ ,  $[\text{PMS}]_0 = 100 \mu\text{M}$ , initial  $\text{pH} = 7.0$ , and temperature =  $25 \text{ }^\circ\text{C}$ .

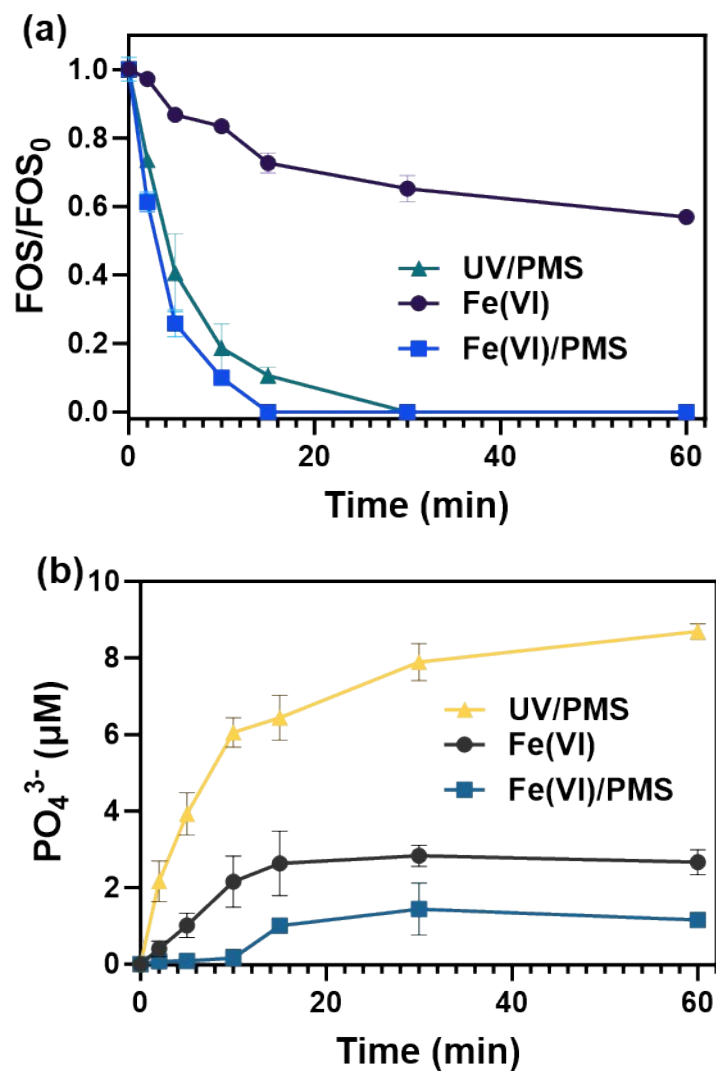

**Figure S5.** (a) FOS degradation and (b) release and precipitation of phosphate from FOS degradation by UV/PMS, Fe(VI), and Fe(VI)/PMS systems. Experimental conditions:  $[FOS]_0 = 10 \mu M$ ,  $Fe(VI) = 200 \mu M$ ,  $[PMS]_0 = 100 \mu M$ , initial pH = 7.0, and temperature = 25 °C. UV irradiation experiments were performed on a photocatalytic reactor (XPA-7, Nanjing Xujiang Motor Factory, China) with a 500 W high-pressure ultraviolet mercury lamp (emission at 365nm, Nanjing Xujiang Motor Factory, China) as the UV irradiation source.

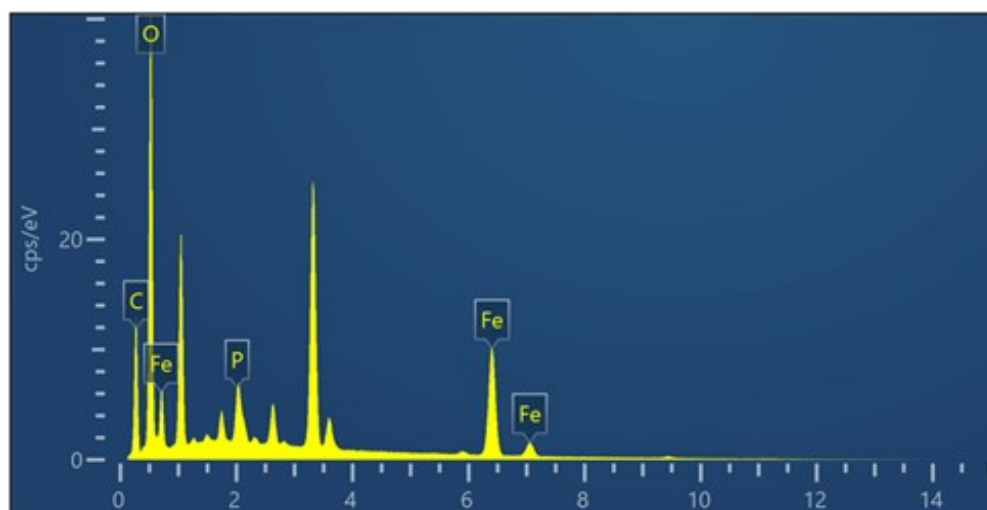

**Figure S6.** SEM-EDS image of the formed floc particles.

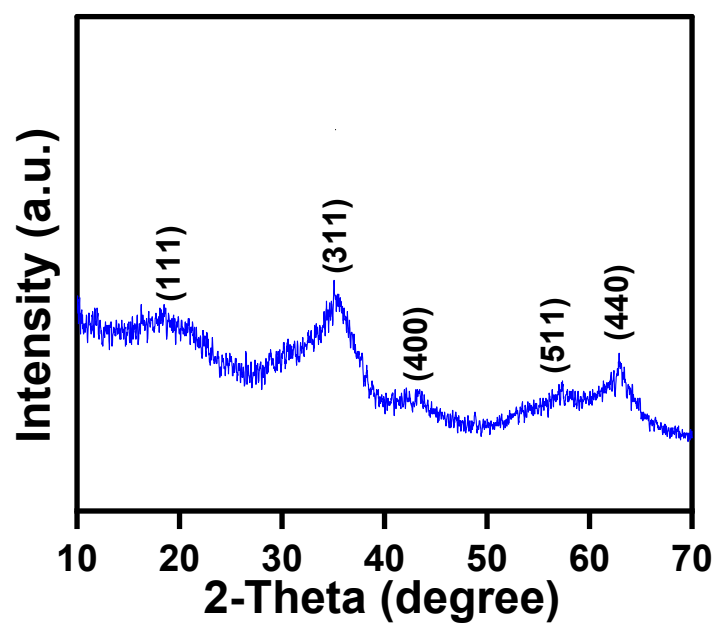

**Figure S7.** XRD pattern of the formed floc particles.

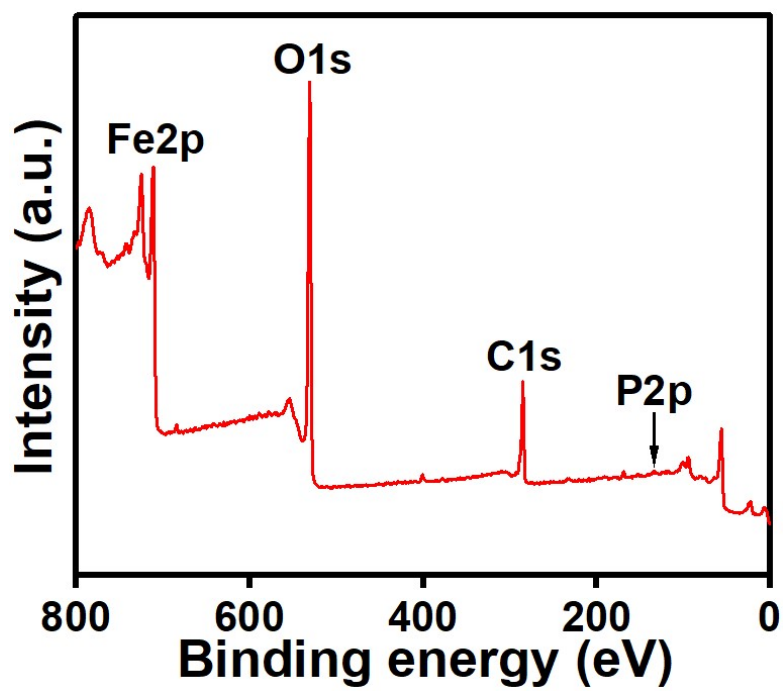

**Figure S8.** XPS full patterns of the formed floc particles.

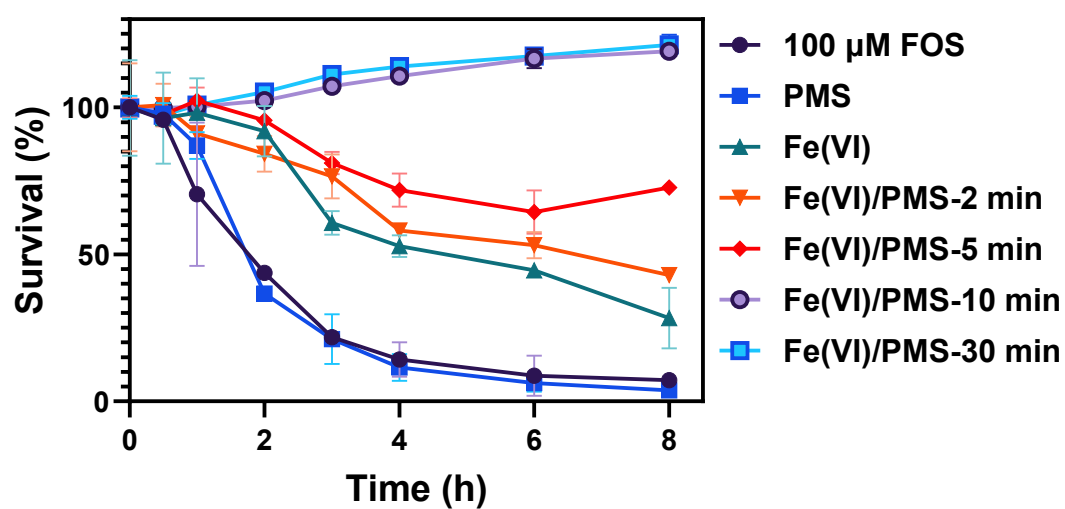

**Figure S9.** The survival of *E. coli* under the exposure of FOS before and after Fe(VI)/PMS oxidation.

## Supplementary Tables

**Table S1.** Primary properties of various water samples.

| Parameter                     | Unit               | Pearl River<br>water | Tap water | WWTP effluent<br>water | South China<br>Sea water |
|-------------------------------|--------------------|----------------------|-----------|------------------------|--------------------------|
| pH                            | -                  | 7.23                 | 7.32      | 6.75                   | 8.17                     |
| TOC                           | mg L <sup>-1</sup> | 4.032                | 0.889     | 6.768                  | 1.369                    |
| Na <sup>+</sup>               | mg L <sup>-1</sup> | 15.77                | 13.08     | 41.17                  | 12408                    |
| K <sup>+</sup>                | mg L <sup>-1</sup> | 5.33                 | 2.98      | 17.68                  | 421                      |
| Cu <sup>2+</sup>              | μg L <sup>-1</sup> | 0.98                 | 0.17      | 0.28                   | 61.23                    |
| Mg <sup>2+</sup>              | mg L <sup>-1</sup> | 4.69                 | 2.78      | 9.37                   | 1552                     |
| Cl <sup>-</sup>               | mg L <sup>-1</sup> | 13.96                | 10.23     | 54.86                  | 18984.02                 |
| HCO <sub>3</sub> <sup>-</sup> | mg L <sup>-1</sup> | 5.33                 | 4.21      | 4.12                   | 6.01                     |
| SO <sub>4</sub> <sup>2-</sup> | mg L <sup>-1</sup> | 22.09                | 15.71     | 42.28                  | 2706.02                  |

**Table S2.** The mobile phase composition and gradient elution for measurement of FOS.

| Time(min)                                                                          | %A | %B |
|------------------------------------------------------------------------------------|----|----|
| 0                                                                                  | 98 | 2  |
| 3.0                                                                                | 10 | 90 |
| 5.0                                                                                | 98 | 2  |
| A: 0.1% formic acid      B: methanol                                               |    |    |
| Flow rate: 0.2 mL min <sup>-1</sup> Temperature: 35 °C      Injection volume: 2 µL |    |    |



**Table S3.** Products of FOS identified by LC-MS and LC-MS/MS in the negative mode.

| Compound | Formula                                        | Retention time (min) | Observed m/z | Fragmentation ions (MS <sup>2</sup> , m/z) | Structure                                                                             |
|----------|------------------------------------------------|----------------------|--------------|--------------------------------------------|---------------------------------------------------------------------------------------|
| FOS      | C <sub>3</sub> H <sub>7</sub> O <sub>4</sub> P | 3.38                 | 137.0008     | 93.0458,<br>78.9590,<br>62.9641            | 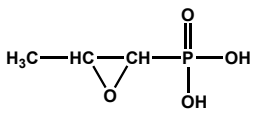   |
| P1-74    | C <sub>3</sub> H <sub>6</sub> O <sub>2</sub>   | 3.02                 | 72.9736      | 62.9854                                    |    |
| P2-76    | C <sub>3</sub> H <sub>8</sub> O <sub>2</sub>   | 8.45                 | 74.9701      | 67.8836,<br>55.4528                        |    |
| P3-90    | C <sub>3</sub> H <sub>6</sub> O <sub>3</sub>   | 5.34                 | 88.9881      | 60.9931                                    |    |
| P4-156   | C <sub>3</sub> H <sub>9</sub> O <sub>5</sub> P | 4.85                 | 154.9774     | 59.0139                                    |    |
| P5-154   | C <sub>3</sub> H <sub>7</sub> O <sub>5</sub> P | 1.08                 | 152.8949     | 59.0139                                    |   |
| P6-150   | C <sub>6</sub> H <sub>14</sub> O <sub>4</sub>  | 11.02                | 149.0602     | 120.9545,<br>63.9926                       |  |
| P7-298   | C <sub>12</sub> H <sub>26</sub> O <sub>8</sub> | 15.58                | 294.1532     | 183.0120                                   |  |

## References

- (1) Sezonov Guennadi; Joseleau-Petit Danièle; D'Ari Richard. *Escherichia coli* physiology in luria-bertani broth. *J. Bacteriol.* 2007, 189 (23), 8746–8749.
- (2) Crittenden, J. C.; Hu, S.; Hand, D. W.; Green, S. A. A kinetic model for  $\text{H}_2\text{O}_2/\text{UV}$  process in a completely mixed batch reactor. *Water Res.* 1999, 33 (10), 2315–2328.
- (3) Ghauch, A.; Baalbaki, A.; Amasha, M.; El Asmar, R.; Tantawi, O. Contribution of persulfate in UV-254nm activated systems for complete degradation of chloramphenicol antibiotic in water. *Chem. Eng. J.* 2017, 317, 1012–1025.
- (4) Lee, M.-Y.; Wang, W.-L.; Xu, Z.-B.; Ye, B.; Wu, Q.-Y.; Hu, H.-Y. The application of UV/PS oxidation for removal of a quaternary ammonium compound of dodecyl trimethyl ammonium chloride (DTAC): The kinetics and mechanism. *Sci. Total Environ.* 2019, 655, 1261–1269.
- (5) Xiao, Y.; Zhang, L.; Zhang, W.; Lim, K.-Y.; Webster, R. D.; Lim, T.-T. Comparative evaluation of iodoacids removal by UV/persulfate and UV/ $\text{H}_2\text{O}_2$  processes. *Water Res.* 2016, 102, 629–639.
